# Supplementary material for: Low-reflection, (110)-orientation-preferred CsPbBr3 nanonet films for application in high-performance perovskite photodetectors
Source: Royal Society of Chemistry journal article supplement (doi:10.1039/c9nr03213d), 2019-01-01
Supplement: c9nr03213d1.pdf [file c9nr03213d1.pdf]

# Low-Reflection, (110)-Orientation-Preferred CsPbBr<sub>3</sub> Nanonet Films for Application in High-Performance Perovskite Photodetectors

Ronghuan Liu,<sup>†</sup> Hai Zhou,<sup>†,\*</sup> Zhaoning Song,<sup>‡</sup> Xiaohan Yang,<sup>†</sup> Dingjun Wu,<sup>†</sup> Zehao  
Song,<sup>†</sup> Hao Wang<sup>†,\*</sup> and Yanfa Yan<sup>‡,\*</sup>

<sup>†</sup>Hubei Key Laboratory of Ferro & Piezoelectric Materials and Devices, Faculty of  
Physics & Electronic Science, Hubei University, Wuhan, 430062, P.R. China.

<sup>‡</sup>Department of Physics and Astronomy and Wright Center for Photovoltaics  
Innovation and Commercialization, The University of Toledo, Toledo, Ohio, 43606,  
USA.

Corresponding Author

A/Prof. Hai Zhou: hizhou@hubu.edu.cn

Prof. Hao Wang: wangh@hubu.edu.cn

Prof.: Yanfa Yan: Yanfa.Yan@utoledo.edu

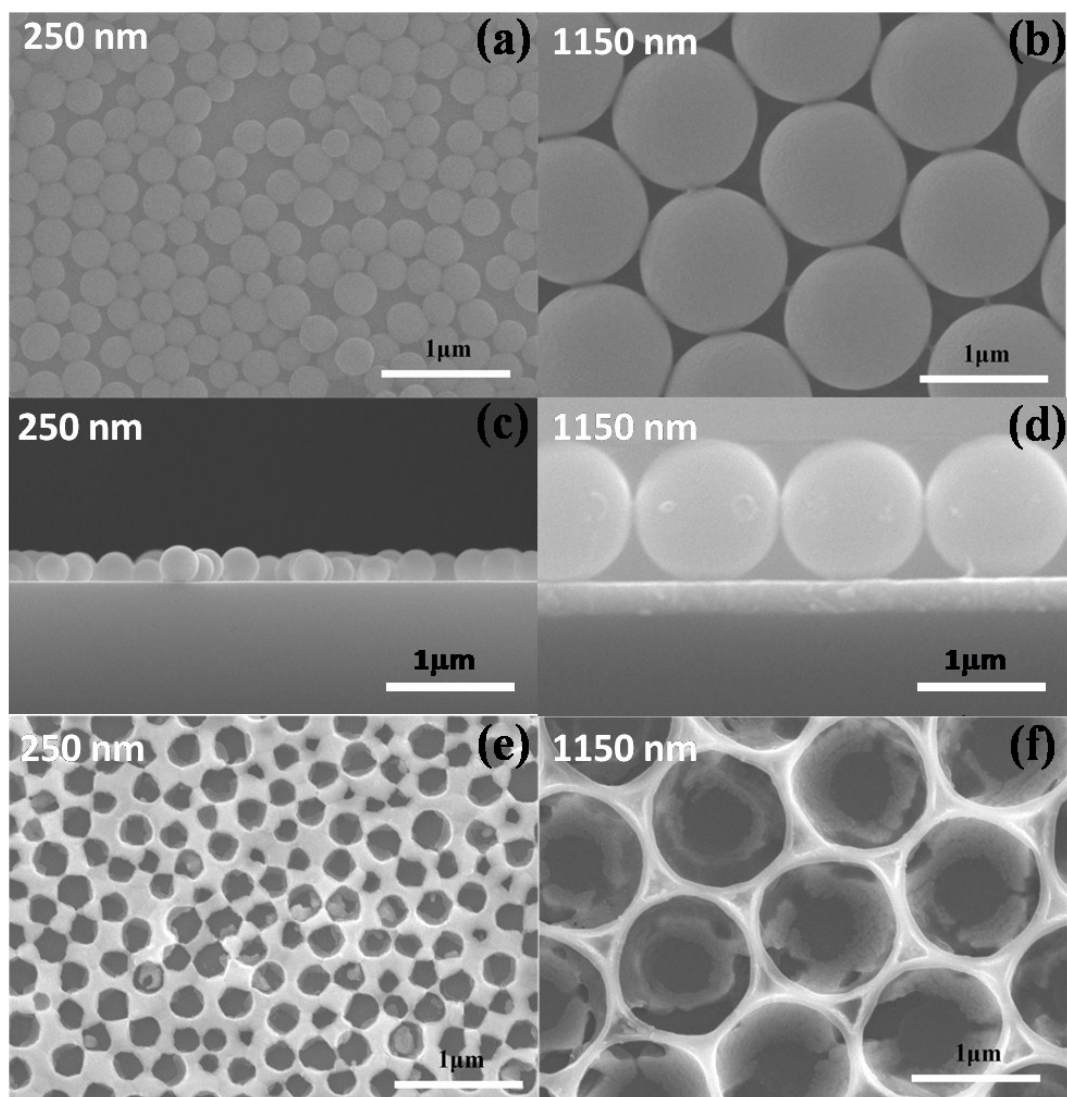

Figure S1 The top SEM images of the PS with the diameter of (a) 250 nm and (b) 1150 nm. The cross sectional SEM images of the PS with the diameter of (c) 250 nm and (d) 1150 nm. The top view of the SEM images of the CsPbBr<sub>3</sub> prepared with the PS diameter of (e) 250 nm and (f) 1150 nm. The scale bars are 1 μm.

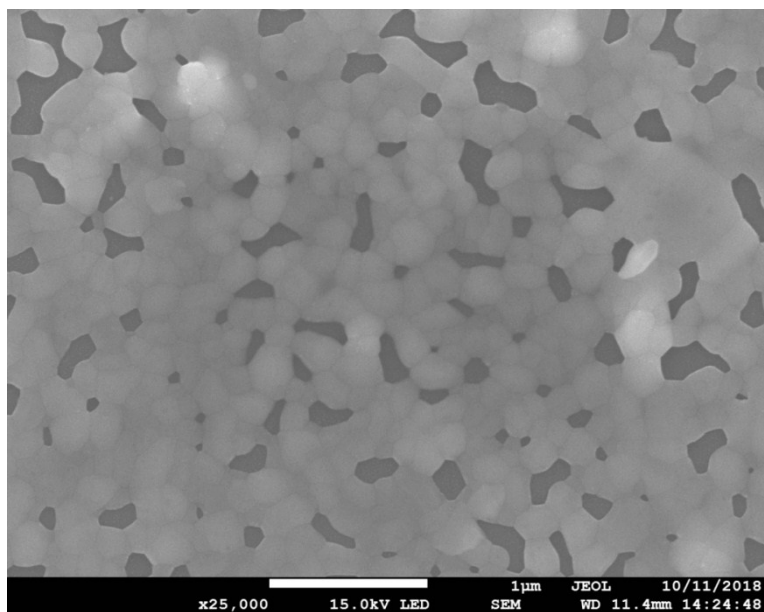

Figure S2 SEM image of CsPbBr<sub>3</sub> film

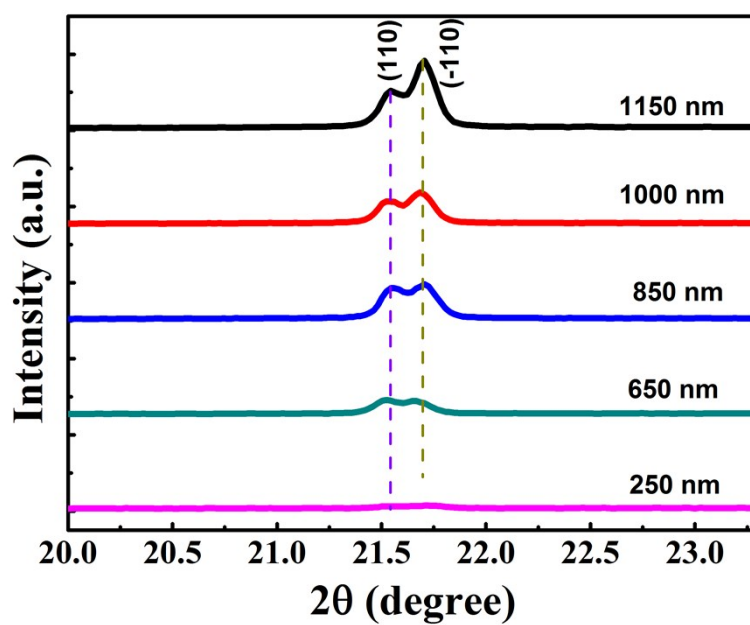

Figure S3 Partially amplified XRD patterns of the CsPbBr<sub>3</sub> NFs.

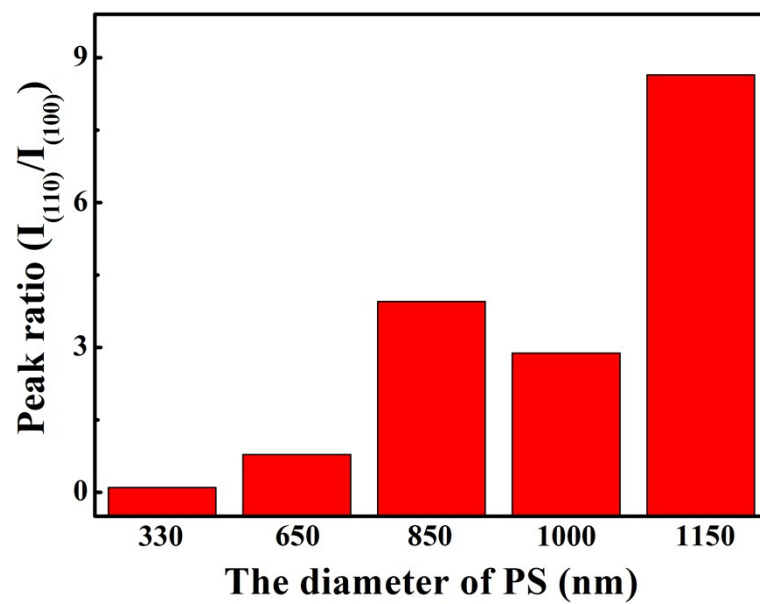

Figure S4 Peak ratios of  $I_{(110)}/I_{(100)}$  vs the diameter of the PS sphere.

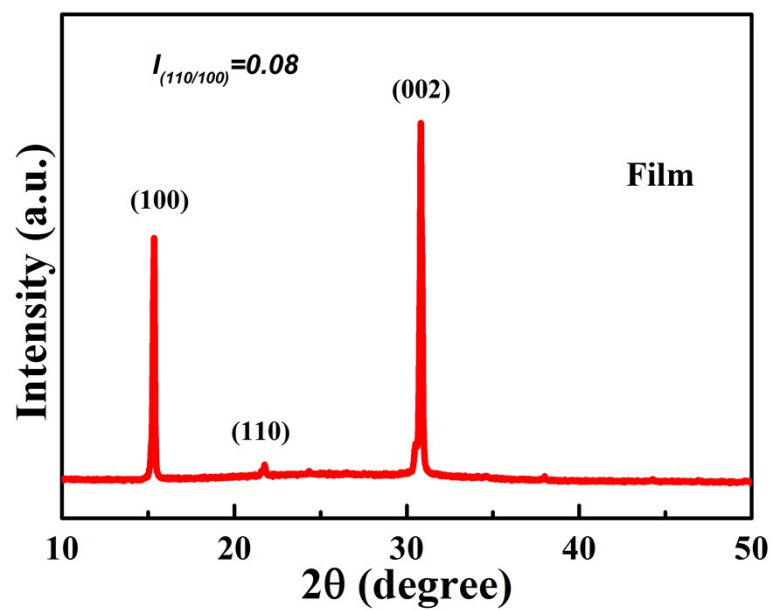

Figure S5 XRD pattern of the CsPbBr<sub>3</sub> films

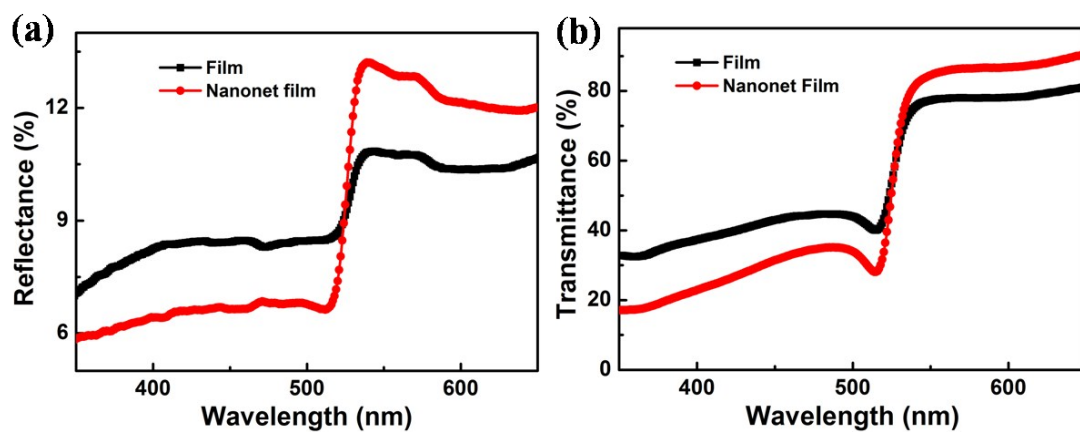

Figure S6 UV-vis spectra of traditionally spin-coated CsPbBr<sub>3</sub> film and CsPbBr<sub>3</sub> nanonet film.

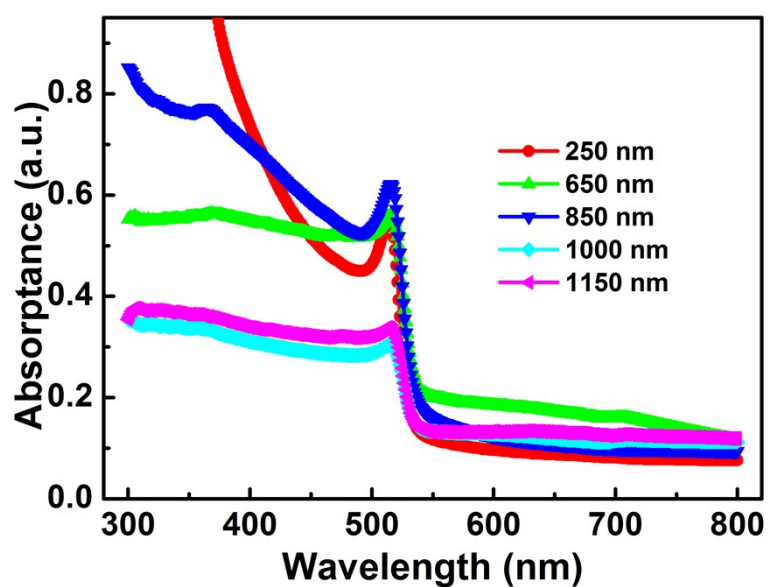

Figure S7 Absorption spectrum of the CsPbBr<sub>3</sub> NF prepared by using various PS spheres.

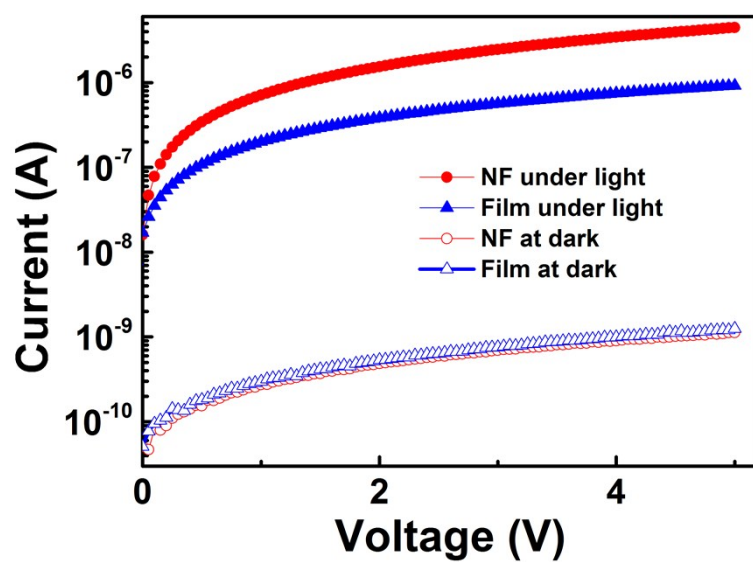

Figure S8 I-V curves of the CsPbBr<sub>3</sub> PDs

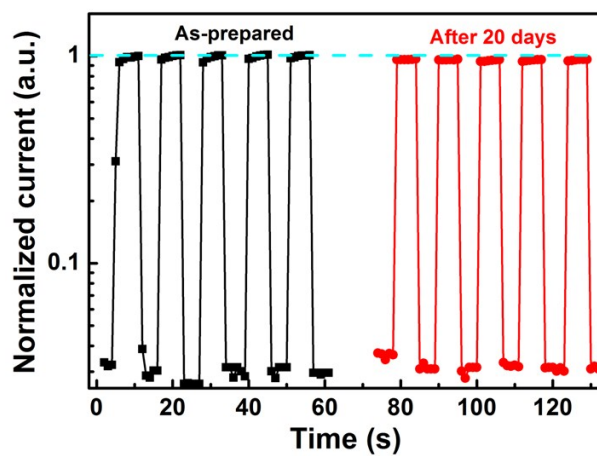

Figure S9 The stability of the device after storage for 20 days in air.

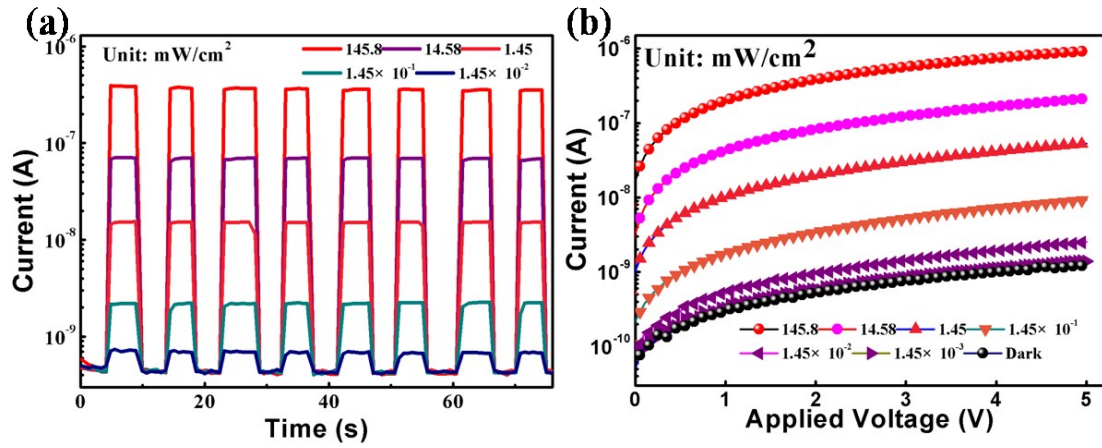

Figure S10 (a) I-t curves of the CsPbBr<sub>3</sub> film PD with various light intensities. (b) I-V curves of the CsPbBr<sub>3</sub> film PD with various light intensities.

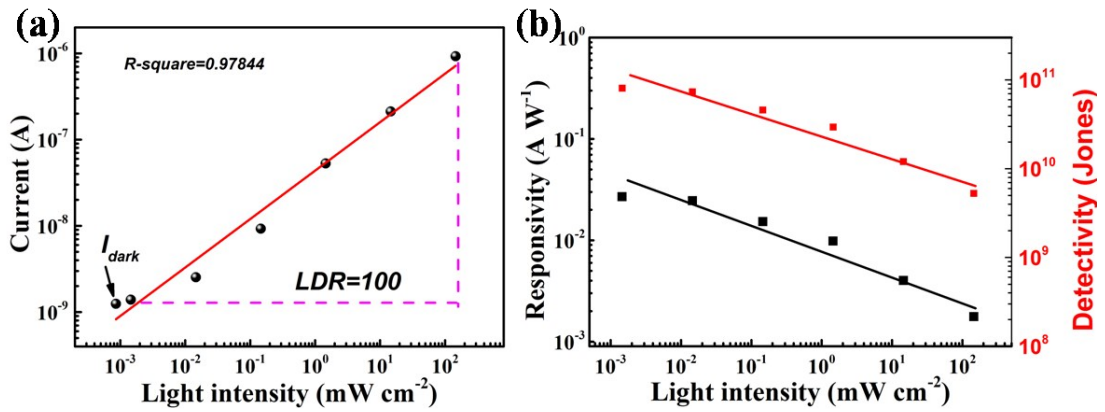

Figure S11 The device performance of the CsPbBr<sub>3</sub> film. (a) Current versus light intensity curve. The LDR of the PD is 100 dB at 5 V bias. (b) Responsivity and detectivity of the PD.

Table S1 The comparison parameters of perovskite PDs

| Structure                                                            | R<br>(A W <sup>-1</sup> ) | D (10 <sup>12</sup><br>Jones) | On/off<br>ratio      | T <sub>rise</sub> /T <sub>fall</sub><br>(ms) | LDR | Reference |
|----------------------------------------------------------------------|---------------------------|-------------------------------|----------------------|----------------------------------------------|-----|-----------|
| CsPbBr <sub>3</sub> nanonet film                                     | 2.84                      | 5.47                          | 4×10 <sup>3</sup>    | 11/16                                        | 120 | This work |
| CsPbBr <sub>3</sub> Single Crystal                                   | 0.028                     |                               | ~100                 | <100                                         | -   | 1         |
| CsPbBr <sub>3</sub> microparticles                                   | 0.18                      | 6.1×10 <sup>-2</sup>          | >8×10 <sup>3</sup>   | 1.8/1.0                                      | -   | 2         |
| CsPbBr <sub>3</sub> Microplatelets                                   | 1.33                      | 0.86                          | 4.56×10 <sup>3</sup> | 20.9/24.6                                    | -   | 3         |
| CsPbBr <sub>3</sub> -Cs <sub>4</sub> PbBr <sub>6</sub><br>Films      | 0.0494                    | 1.2                           |                      | 0.0078/ 0.033                                | -   | 4         |
| Two-Dimensional<br>MoS <sub>2</sub> /CsPbBr <sub>3</sub>             | 4.4                       | 0.025                         | 1.67×10 <sup>4</sup> | 0.72/1.01                                    | -   | 5         |
| CsPbBr <sub>3</sub> -CsPb <sub>2</sub> Br <sub>5</sub> Thin<br>Films | 0.375                     | 0.296                         | 380                  | 0.28/0.64                                    | -   | 6         |

## REFERENCES

- (1) Ding, J.; Du, S.; Zuo, Z.; Zhao, Y.; Cui, H.; Zhan, X. High Detectivity and Rapid Response in Perovskite CsPbBr<sub>3</sub> Single-Crystal Photodetector. *J. Phys. Chem. C*. **2017**, *121*(9), 4917-4923.
- (2) Li, X.; Yu, D.; Fei, C.; Yu, G.; Yi, W.; Ye, W.; Song, J.; Zeng, H. Healing All-Inorganic Perovskite Films via Recyclable Dissolution-Recrystallization for Compact and Smooth Carrier Channels of Optoelectronic Devices with High Stability. *Adv. Funct. Mater.* **2016**, *26*(32), 5903-5912
- (3) Li, Y.; Shi, Z.; Lei, L.; Zhang, F.; Ma, Z.; Wu, D.; Xu, T.; Tian, Y.; Zhang, Y.; Du, G.; Shan, C.; Li, X. Highly Stable Perovskite Photodetector Based on Vapor-Processed Micrometer-Scale CsPbBr<sub>3</sub> Microplatelets. *Chem. Mater.* **2018**, *30*(19), 6744-6755.
- (4) Tong, G.; Li, H.; Zhu, Z.; Zhang, Y.; Yu, L.; Xu, J.; Jiang, Y. Enhancing Hybrid Perovskite Detectability in Deep Ultraviolet Region with Down-Conversion



- Dual-Phase (CsPbBr<sub>3</sub>-Cs<sub>4</sub>PbBr<sub>6</sub>) Films. *J. Phys. Chem. L.* **2018**, *9*(7), 1592-1599.
- (5) Song, X.; Liu, X.; Yu, D.; Huo, C.; Ji, J.; Li, X.; Zhang, S.; Zuo, Y.; Zhu, G.; Wang, Y.; Wu, M.; Xie, A.; Zeng, H. Boosting Two-Dimensional MoS<sub>2</sub>/CsPbBr<sub>3</sub> Photodetectors Via Enhanced Light Absorbance and Interfacial Carrier Separation. *ACS Appl. Mat. Interfaces.* **2018**, *10*(3), 2801-2809.
- (6) Tong, G.; Li, H.; Li, D.; Zhu, Z.; Xu, E.; Li, G.; Yu, L.; Xu, J.; Jiang, Y. Dual-Phase CsPbBr<sub>3</sub>-CsPb<sub>2</sub>Br<sub>5</sub> Perovskite Thin Films Via Vapor Deposition for High-Performance Rigid and Flexible Photodetectors. *Small.* **2018**, *14*(7), 1702523.
